# Supplementary material for: Milk polar lipids favorably alter circulating and intestinal ceramide and sphingomyelin species in postmenopausal women
Source: PubMed Central journal article supplement (PMC8262315; doi:10.1172/jci.insight.146161), 2021-05-24
Supplement: jciinsight-6-146161-s276.pdf [file jciinsight-6-146161-s276.pdf]

**Supplemental Table 1. SM and Cer species of interest in control and milk PL-enriched cream cheeses.**

| Species |              | Control                | 3g-PL | 5g-PL | Relative proportion (%) |
|---------|--------------|------------------------|-------|-------|-------------------------|
|         |              | µmol / 100 g of cheese |       |       |                         |
| SM      | <b>C16:0</b> | 3.4                    | 101.4 | 128.6 | 26.3                    |
|         | <b>C16:1</b> | < 0.1                  | 2.7   | 3.3   | < 1                     |
|         | <b>C18:0</b> | 0.4                    | 10.9  | 13.6  | 2.8                     |
|         | <b>C18:1</b> | < 0.1                  | 1.6   | 1.9   | < 1                     |
|         | <b>C20:0</b> | 1.4                    | 47.2  | 59.4  | 12.2                    |
|         | <b>C20:1</b> | < 0.1                  | 1.3   | 1.6   | < 1                     |
|         | <b>C22:0</b> | 3.4                    | 117.4 | 147.5 | 30.3                    |
|         | <b>C22:1</b> | 0.5                    | 15.9  | 19.7  | 4.1                     |
|         | <b>C24:0</b> | 1.8                    | 69.0  | 86.1  | 17.8                    |
|         | <b>C24:1</b> | 0.6                    | 17.4  | 21.5  | 4.5                     |
|         | <b>C26:0</b> | < 0.1                  | 1.9   | 2.4   | < 1                     |
|         | <b>C26:1</b> | < 0.1                  | 0.7   | 0.8   | < 1                     |
| Cer     | <b>C16:0</b> | 0.2                    | 3.5   | 6.4   | 29.7                    |
|         | <b>C16:1</b> | < 0.1                  | < 0.1 | < 0.1 | < 1                     |
|         | <b>C18:0</b> | < 0.1                  | 0.3   | 0.6   | 2.7                     |
|         | <b>C18:1</b> | < 0.1                  | < 0.1 | < 0.1 | < 1                     |
|         | <b>C20:0</b> | < 0.1                  | 0.2   | 0.3   | 1.5                     |
|         | <b>C20:1</b> | < 0.1                  | < 0.1 | < 0.1 | < 1                     |
|         | <b>C22:0</b> | 0.2                    | 3.2   | 6.0   | 27.5                    |
|         | <b>C22:1</b> | < 0.1                  | 0.1   | 0.2   | < 1                     |
|         | <b>C24:0</b> | 0.3                    | 3.6   | 6.4   | 30.1                    |
|         | <b>C24:1</b> | < 0.1                  | 0.7   | 1.2   | 5.8                     |
|         | <b>C26:0</b> | < 0.1                  | < 0.1 | 0.1   | < 1                     |
|         | <b>C26:1</b> | < 0.1                  | < 0.1 | < 0.1 | < 1                     |

Results are presented based on the assumption of sphingosine d18:1 as the major sphingoid base for determined SM and Cer species. Cer: ceramides; PL: polar lipids; SM: sphingomyelin.

*Nota Bene: Cream cheese macronutrient and fatty acid composition is described in Vors et al. Gut 2020 (Supplemental Table 1) – all cheeses were isocaloric and contained similar amounts of total fat (13g/100g), proteins and carbohydrates.*

**Supplemental Table 2. Effect of milk SP via milk PL supplementation on serum SM and Cer molecular profiles (complementary to Table 1, VALOBAB-C trial).**

|     | %            | Control    |                        | 3g-PL      |                          | 5g-PL      |                         | $P_{\text{group}}$          | $P_{\text{PL}}$            |
|-----|--------------|------------|------------------------|------------|--------------------------|------------|-------------------------|-----------------------------|----------------------------|
|     |              | V1         | $\Delta\text{V2-V1}$   | V1         | $\Delta\text{V2-V1}$     | V1         | $\Delta\text{V2-V1}$    |                             |                            |
| SM  | <b>C16:0</b> | 32.17±2.03 | 0.58±0.42              | 32.79±1.57 | 0.35±0.66                | 31.87±1.89 | -0.22±0.69              | 0.63                        | 0.49                       |
|     | <b>C16:1</b> | 4.75±0.3   | 0.11±0.1 <sup>a</sup>  | 4.96±0.31  | 0.23±0.14 <sup>a</sup>   | 4.88±0.31  | -0.42±0.14 <sup>b</sup> | <b>0.003</b> <sup>†</sup>   | 0.29                       |
|     | <b>C18:0</b> | 7.73±0.43  | 0.05±0.22              | 7.91±0.28  | -0.17±0.18               | 7.75±0.35  | -0.26±0.19              | 0.53                        | 0.27                       |
|     | <b>C18:1</b> | 3.75±0.31  | 0.2±0.13 <sup>a</sup>  | 3.98±0.24  | -0.4±0.13 <sup>b</sup>   | 3.59±0.18  | -0.49±0.14 <sup>b</sup> | <b>0.002</b> <sup>†</sup>   | <b>0.0001</b> <sup>†</sup> |
|     | <b>C20:0</b> | 4.9±0.19   | 0.14±0.14 <sup>a</sup> | 5.08±0.2   | 0.62±0.08 <sup>b</sup>   | 5.3±0.25   | 0.95±0.09 <sup>b</sup>  | <b>0.00005</b> <sup>†</sup> | <b>0.0004</b> <sup>†</sup> |
|     | <b>C20:1</b> | 2.15±0.11  | 0.12±0.08 <sup>a</sup> | 2.2±0.08   | -0.01±0.08 <sup>ab</sup> | 2.2±0.12   | -0.2±0.07 <sup>b</sup>  | <b>0.018</b>                | <b>0.026</b>               |
|     | <b>C22:0</b> | 8.45±0.37  | 0.18±0.29              | 8.14±0.46  | 0.67±0.21                | 8.95±0.41  | 0.99±0.33               | 0.14                        | 0.067                      |
|     | <b>C22:1</b> | 7.9±0.43   | -0.02±0.1              | 7.92±0.44  | 0.65±0.27                | 8.35±0.43  | 0.56±0.23               | 0.07                        | <b>0.021</b>               |
|     | <b>C24:0</b> | 7.29±0.35  | -0.28±0.29             | 6.65±0.33  | -0.2±0.26                | 7.05±0.4   | 0.07±0.28               | 0.64                        | 0.53                       |
|     | <b>C24:1</b> | 20.61±1.42 | -1.04±0.23             | 20.08±0.83 | -1.71±0.33               | 19.81±1.23 | -0.97±0.47              | 0.30                        | 0.51                       |
|     | <b>C26:0</b> | 0.11±0.01  | -0.01±0.01             | 0.09±0.01  | -0.02±0.01               | 0.09±0.01  | 0.01±0.01               | 0.32                        | 0.75                       |
|     | <b>C26:1</b> | 0.19±0.03  | -0.03±0.01             | 0.17±0.02  | -0.02±0.01               | 0.18±0.02  | -0.01±0.02              | 0.75                        | 0.47                       |
| Cer | <b>C16:0</b> | 9.22±0.63  | -0.45±0.47             | 8.58±0.04  | 0.17±0.40                | 8.38±0.59  | 0.29±0.85               | 0.66                        | 0.36                       |
|     | <b>C16:1</b> | 5.90±0.64  | -0.85±0.65             | 5.09±0.42  | 0.24±0.35                | 4.41±0.42  | 0.04±0.28               | 0.23                        | 0.09                       |
|     | <b>C18:0</b> | 6.78±0.39  | -0.64±0.44             | 7.16±0.31  | 0.21±0.35                | 6.57±0.85  | -0.67±0.79              | 0.46                        | 0.56                       |
|     | <b>C18:1</b> | 1.26±0.16  | -0.15±0.13             | 1.16±0.15  | 0.00±0.14                | 1.08±0.12  | -0.01±0.09              | 0.64                        | 0.34                       |
|     | <b>C20:0</b> | 11.12±1.27 | -1.44±0.65             | 11.11±1.05 | 0.38±0.56                | 9.82±0.90  | 0.47±0.60               | 0.057                       | <b>0.016</b>               |
|     | <b>C20:1</b> | 2.45±1.02  | -0.05±0.32             | 2.16±0.81  | 0.07±0.18                | 2.37±0.81  | 0.13±0.24               | 0.88                        | 0.63                       |
|     | <b>C22:0</b> | 10.71±0.65 | 0.62±0.75              | 11.14±0.52 | 0.39±0.25                | 12.00±0.65 | 0.61±0.53               | 0.95                        | 0.86                       |
|     | <b>C22:1</b> | 0.60±0.06  | -0.09±0.07             | 0.53±0.05  | -0.05±0.04               | 0.46±0.05  | -0.02±0.06              | 0.74                        | 0.47                       |
|     | <b>C24:0</b> | 32.26±2.25 | 2.39±1.72              | 32.50±1.44 | 0.83±1.23                | 34.13±1.93 | 1.85±0.94               | 0.95                        | 0.52                       |
|     | <b>C24:1</b> | 17.76±0.92 | 0.65±0.76 <sup>a</sup> | 18.54±0.95 | -2.67±0.96 <sup>b</sup>  | 18.88±0.47 | -2.65±0.71 <sup>b</sup> | <b>0.01</b>                 | <b>0.002</b> <sup>†</sup>  |
|     | <b>C26:0</b> | 1.33±0.16  | 0.08±0.16              | 1.41±0.15  | 0.57±0.59                | 1.38±0.19  | 0.06±0.13               | 0.54                        | 0.60                       |
|     | <b>C26:1</b> | 0.61±0.09  | -0.10±0.08             | 0.63±0.05  | -0.15±0.05               | 0.53±0.05  | -0.09±0.06              | 0.81                        | 0.83                       |

Data are presented as mean ± SEM and expressed as the percentage of each SM or Cer species in total analyzed serum SM or Cer, respectively, n = 10 / group. Results are presented based on the assumption of sphingosine d18:1 as the major sphingoid base.  $P$  values presented in bold highlight significant intervention effect.  $P_{\text{group}}$  represents  $P$  value associated with group effect as calculated by generalized linear model, while  $P_{\text{PL}}$  represents  $P$  value associated with binary effect of milk PL compared to control. <sup>†</sup> $P$  value remains significant (< 0.05) after adjustment for clinical center, quartiles of volunteer age and waist circumference. <sup>a,b</sup> Different superscript letters indicate statistically different intervention effects between groups as calculated by *post hoc* analysis (Tukey-Kramer's test). Cer: ceramides; PL: polar lipids; SM: sphingomyelin.

**Supplemental Table 3. Kinetics of CMRF total SM and Cer before and after milk PL supplementation during 4 weeks (complementary to Figure 3 and Supplemental Figure 2, VALOBAB-C trial).**

|           |       | SP species in CMRF |                 |               |                         |              |
|-----------|-------|--------------------|-----------------|---------------|-------------------------|--------------|
|           |       | min                | μmol / L plasma |               | μmol / mmol of CMRF TAG |              |
|           |       |                    | V1              | V2            | V1                      | V2           |
| Total SM  | CTL   | 120                | 7.91 ± 1.07     | 10.65 ± 2.53  | 9.32 ± 0.81             | 11.08 ± 1.60 |
|           |       | 240                | 13.29 ± 2.03    | 15.84 ± 2.52  | 9.35 ± 1.66             | 9.72 ± 1.54  |
|           |       | 300                | 15.55 ± 2.36    | 18.53 ± 2.56  | 8.61 ± 0.83             | 9.42 ± 0.85  |
|           |       | 360                | 14.36 ± 2.35    | 17.14 ± 3.40  | 11.78 ± 1.12            | 14.03 ± 1.40 |
|           |       | 480                | 8.51 ± 1.40     | 9.66 ± 0.92   | 12.33 ± 1.29            | 13.74 ± 1.64 |
|           | 3g-PL | 120                | 14.33 ± 4.46    | 12.44 ± 4.39  | 15.14 ± 3.18            | 12.79 ± 2.87 |
|           |       | 240                | 21.44 ± 5.81    | 23.08 ± 8.62  | 13.85 ± 3.48            | 13.92 ± 3.04 |
|           |       | 300                | 27.41 ± 8.66    | 22.62 ± 7.35  | 12.28 ± 1.40            | 10.62 ± 2.20 |
|           |       | 360                | 22.64 ± 9.27    | 25.77 ± 11.70 | 18.14 ± 3.54            | 15.76 ± 2.12 |
|           |       | 480                | 18.28 ± 9.21    | 21.07 ± 11.52 | 17.15 ± 2.17            | 14.58 ± 1.62 |
|           | 5g-PL | 120                | 11.31 ± 2.12    | 10.09 ± 1.64  | 11.37 ± 0.71            | 11.05 ± 0.90 |
|           |       | 240                | 16.95 ± 3.69    | 14.08 ± 2.99  | 12.25 ± 1.48            | 11.82 ± 1.44 |
|           |       | 300                | 19.95 ± 4.45    | 13.95 ± 3.59  | 10.60 ± 1.15            | 10.53 ± 0.92 |
|           |       | 360                | 18.85 ± 4.78    | 12.56 ± 3.86  | 14.65 ± 1.34            | 12.07 ± 1.34 |
|           |       | 480                | 13.62 ± 3.78    | 9.43 ± 2.54   | 15.49 ± 1.63            | 13.98 ± 1.95 |
| Total Cer | CTL   | 120                | 1.14 ± 0.10     | 1.23 ± 0.09   | 1.43 ± 0.21             | 1.40 ± 0.12  |
|           |       | 240                | 1.82 ± 0.29     | 2.04 ± 0.24   | 1.19 ± 0.12             | 1.23 ± 0.07  |
|           |       | 300                | 2.11 ± 0.41     | 2.45 ± 0.42   | 1.12 ± 0.09             | 1.26 ± 0.17  |
|           |       | 360                | 1.98 ± 0.49     | 2.35 ± 0.42   | 1.61 ± 0.15             | 1.90 ± 0.13  |
|           |       | 480                | 1.06 ± 0.21     | 1.21 ± 0.21   | 1.54 ± 0.25             | 1.62 ± 0.17  |
|           | 3g-PL | 120                | 2.58 ± 1.13     | 2.27 ± 0.83   | 2.22 ± 0.24             | 2.07 ± 0.33  |
|           |       | 240                | 3.53 ± 1.22     | 3.46 ± 1.30   | 1.92 ± 0.28             | 1.87 ± 0.35  |
|           |       | 300                | 4.28 ± 1.51     | 4.00 ± 1.38   | 1.83 ± 0.22             | 1.71 ± 0.34  |
|           |       | 360                | 3.76 ± 1.69     | 3.73 ± 1.50   | 3.04 ± 0.69             | 2.71 ± 0.73  |
|           |       | 480                | 2.30 ± 1.08     | 2.77 ± 1.26   | 2.37 ± 0.27             | 2.12 ± 0.18  |
|           | 5g-PL | 120                | 1.43 ± 0.17     | 1.28 ± 0.20   | 1.63 ± 0.22             | 1.50 ± 0.25  |
|           |       | 240                | 2.14 ± 0.47     | 1.69 ± 0.46   | 1.56 ± 0.13             | 1.31 ± 0.12  |
|           |       | 300                | 2.72 ± 0.61     | 1.85 ± 0.57   | 1.47 ± 0.17             | 1.51 ± 0.31  |
|           |       | 360                | 2.37 ± 0.61     | 1.60 ± 0.41   | 1.90 ± 0.22             | 1.69 ± 0.17  |
|           |       | 480                | 1.47 ± 0.32     | 1.12 ± 0.21   | 1.85 ± 0.16             | 1.77 ± 0.22  |

Data are presented as mean ± SEM (n = 6 / group) and correspond to total analyzed SM and Cer in intestine-derived chylomicrons before (V1) and after (V2) the 4-week nutritional intervention with milk PL. Raw results are expressed in μmol / L of plasma (Total SM:  $P_{\text{group}}=0.015$ ,  $P_{\text{PL}}=0.025$ ,  $P_{\text{CTL vs 3g-PL}}=0.53$ ,  $P_{\text{CTL vs 5g-PL}}=0.013$ ,  $P_{\text{3g vs 5g-PL}}=0.10$ ; Total Cer:  $P_{\text{group}}=0.053$ ,  $P_{\text{PL}}=0.051$ ,  $P_{\text{CTL vs 3g-PL}}=0.58$ ,  $P_{\text{CTL vs 5g-PL}}=0.045$ ,  $P_{\text{3g vs 5g-PL}}=0.25$ ) and were normalized by CMRF TAG plasma concentration. ΔV2-V1 kinetic curves are presented in the Figure 3A and B with corresponding statistical analysis. Cer: ceramides; CMRF: chylomicron-rich fraction; CTL: control; PL: polar lipids; SP: sphingolipids; SM: sphingomyelins; TAG: triacylglycerols.

**Supplemental Table 4. Impact of milk SP *via* milk PL supplementation during 4 weeks on SM and Cer species in feces of postmenopausal women (complementary to Figure 5, VALOBAB-C trial).**

|              | nmol/g               | CTL                                |                                  | 3gPL                               |                                    | 5gPL                                  |                                     | $P_{\text{group}}$          | $P_{\text{PL}}$             |
|--------------|----------------------|------------------------------------|----------------------------------|------------------------------------|------------------------------------|---------------------------------------|-------------------------------------|-----------------------------|-----------------------------|
|              |                      | V1                                 | $\Delta\text{V2-V1}$             | V1                                 | $\Delta\text{V2-V1}$               | V1                                    | $\Delta\text{V2-V1}$                |                             |                             |
| SM           | <b>C16:0</b>         | 77.9 [42.5; 151.3]                 | -40.2 [-75.8; 0.7]               | 57.0 [27.6; 262.1]                 | -14.5 [-160.8; 155.5]              | 57.4 [29.2; 86.2]                     | 11.1 [-7.7; 706.6]                  | 0.091                       | 0.078                       |
|              | <b>C16:1</b>         | 2.3 [2.1; 4.3]                     | -0.2 [-1.8; 0.7]                 | 1.7 [1.2; 8.1]                     | 0.2 [-3.5; 2.4]                    | 1.0 [0.6; 2.7]                        | 1.1 [0.0; 12.0]                     | 0.37                        | 0.31                        |
|              | <b>C18:0</b>         | 12.7 [7.4; 15.7]                   | -1.4 [-11.7; 5.3]                | 11.3 [4.3; 78.7]                   | 4.5 [-52.3; 55.3]                  | 16.4 [4.5; 27.5]                      | 0.3 [-7.9; 105.0]                   | 0.53                        | 0.28                        |
|              | <b>C18:1</b>         | 3.4 [2.3; 5.6]                     | 0.2 [-3.0; 2.6]                  | 2.2 [1.0; 7.4]                     | 5.5 [-1.8; 216.5]                  | 2.7 [1.3; 4.8]                        | 15.0 [5.6; 65.6]                    | 0.12                        | <b>0.043</b>                |
|              | <b>C20:0</b>         | 8.0 [4.7; 14.4]                    | -2.0 [-6.0; 1.1]                 | 8.4 [5.5; 18.3]                    | 4.6 [-6.3; 70.6]                   | 8.4 [4.2; 11.4]                       | 25.7 [-0.6; 219.2]                  | 0.063                       | <b>0.026</b> <sup>†</sup>   |
|              | <b>C20:1</b>         | 2.0 [1.5; 4.0]                     | -0.2 [-0.9; 4.2]                 | 2.1 [0.8; 3.7]                     | 5.0 [-0.5; 32.5]                   | 1.9 [1.3; 2.7]                        | 2.9 [0.5; 12.1]                     | 0.24                        | 0.089                       |
|              | <b>C22:0</b>         | 23.7 [18.5; 35.0]                  | -9.6 [-20.3; 0.8] <sup>a</sup>   | 16.1 [11.3; 54.9]                  | 173.1 [-6.1; 177.8] <sup>ab</sup>  | 14.4 [9.5; 22.4]                      | 162.7 [6.8; 1066.7] <sup>b</sup>    | <b>0.009</b> <sup>†</sup>   | <b>0.003</b> <sup>†</sup>   |
|              | <b>C22:1</b>         | 4.0 [2.6; 8.4]                     | -0.8 [-2.9; 0.2] <sup>a</sup>    | 3.2 [1.6; 11.2]                    | 14.6 [6.4; 57.1] <sup>b</sup>      | 2.0 [1.5; 7.8]                        | 37.4 [9.2; 82.1] <sup>b</sup>       | <b>0.00006</b> <sup>†</sup> | <b>0.00001</b> <sup>†</sup> |
|              | <b>C24:0</b>         | 14.7 [9.3; 40.1]                   | -1.9 [-21.6; 4.7] <sup>a</sup>   | 20.0 [10.2; 49.3]                  | 88.9 [7.2; 194.2] <sup>b</sup>     | 13.7 [10.8; 16.8]                     | 84.6 [10.1; 736.5] <sup>b</sup>     | <b>0.011</b> <sup>†</sup>   | <b>0.002</b> <sup>†</sup>   |
|              | <b>C24:1</b>         | 19.0 [7.0; 31.9]                   | -0.4 [-19.0; 0.2] <sup>a</sup>   | 21.1 [7.6; 53.7]                   | 30.9 [-2.7; 187.2] <sup>ab</sup>   | 8.0 [5.7; 15.5]                       | 90.0 [9.0; 192.4] <sup>b</sup>      | <b>0.009</b> <sup>†</sup>   | <b>0.002</b> <sup>†</sup>   |
|              | <b>C26:0</b>         | 2.0 [0.8; 3.2]                     | -1.5 [-2.0; 0.3] <sup>a</sup>    | 2.2 [0.4; 2.6]                     | 2.4 [-1.7; 6.9] <sup>ab</sup>      | 1.2 [0.8; 1.8]                        | 4.3 [0.2; 20.0] <sup>b</sup>        | <b>0.024</b> <sup>†</sup>   | <b>0.010</b> <sup>†</sup>   |
|              | <b>C26:1</b>         | 1.4 [0.7; 1.7]                     | -0.1 [-0.8; 3.7]                 | 1.8 [0.8; 4.7]                     | 3.5 [-1.9; 117.4]                  | 0.6 [0.3; 1.8]                        | 5.7 [2.3; 43.7]                     | 0.22                        | 0.10                        |
| <b>MU</b>    | 44.2 [17.5; 50.7]    | -1.7 [-22.4; 26.4] <sup>a</sup>    | 48.2 [12.0; 92.5]                | 60.0 [-4.8; 610.1] <sup>b</sup>    | 17.5 [13.3; 52.7]                  | 259.1 [30.3; 401.8] <sup>b</sup>      | <b>0.019</b> <sup>†</sup>           | <b>0.005</b> <sup>†</sup>   |                             |
| <b>SAT</b>   | 147.1 [83.2; 266.5]  | -87.9 [-168.1; 1.7] <sup>a</sup>   | 104.9 [65.9; 486.5]              | 101.0 [-68.3; 539.1] <sup>ab</sup> | 112.7 [57.9; 158.8]                | 277.4 [12.2; 2915.9] <sup>b</sup>     | <b>0.017</b> <sup>†</sup>           | <b>0.005</b> <sup>†</sup>   |                             |
| <b>Total</b> | 209.1 [107.5; 345.1] | -61.5 [-190.5; -0.0] <sup>a</sup>  | 226.9 [98.0; 579.0]              | 541.9 [25.7; 2117.8] <sup>ab</sup> | 140.6 [109.9; 188.0]               | 511.1 [201.0; 3188.3] <sup>b</sup>    | <b>0.006</b> <sup>†</sup>           | <b>0.001</b> <sup>†</sup>   |                             |
| Cer          | <b>C16:0</b>         | 152.3 [71.2; 199.0]                | -23.3 [-125.4; 7.5] <sup>a</sup> | 174.9 [88.4; 234.0]                | 1319.0 [-2.6; 2105.1] <sup>b</sup> | 150.0 [107.1; 326.5]                  | 1255.3 [481.8; 4006.2] <sup>b</sup> | <b>0.0005</b> <sup>†</sup>  | <b>0.0001</b> <sup>†</sup>  |
|              | <b>C16:1</b>         | 5.0 [2.9; 7.4]                     | 0.3 [-4.3; 1.5] <sup>a</sup>     | 5.5 [2.7; 7.2]                     | 10.1 [-1.4; 24.6] <sup>ab</sup>    | 6.2 [3.4; 9.4]                        | 17.9 [6.6; 45.5] <sup>b</sup>       | <b>0.004</b> <sup>†</sup>   | <b>0.002</b> <sup>†</sup>   |
|              | <b>C18:0</b>         | 35.2 [17.6; 87.2]                  | -2.4 [-17.2; 17.2] <sup>a</sup>  | 49.5 [22.8; 106.0]                 | 592.0 [6.9; 782.4] <sup>b</sup>    | 61.3 [29.3; 102.6]                    | 249.0 [103.1; 1408.6] <sup>b</sup>  | <b>0.002</b> <sup>†</sup>   | <b>0.0005</b> <sup>†</sup>  |
|              | <b>C18:1</b>         | 30.9 [18.2; 53.3]                  | -12.3 [-21.9; -1.6] <sup>a</sup> | 24.1 [17.6; 54.0]                  | 224.5 [2.2; 315.6] <sup>b</sup>    | 31.6 [25.7; 52.5]                     | 282.3 [124.6; 786.7] <sup>b</sup>   | <b>0.0003</b> <sup>†</sup>  | <b>0.0001</b> <sup>†</sup>  |
|              | <b>C20:0</b>         | 3.2 [2.3; 13.3]                    | -0.5 [-2.4; 3.1] <sup>a</sup>    | 8.8 [5.3; 11.7]                    | 78.5 [-0.9; 183.9] <sup>b</sup>    | 12.1 [4.6; 14.5]                      | 52.4 [18.2; 234.4] <sup>b</sup>     | <b>0.004</b> <sup>†</sup>   | <b>0.001</b> <sup>†</sup>   |
|              | <b>C20:1</b>         | 1.6 [0.9; 3.8]                     | -0.4 [-2.4; 0.0] <sup>a</sup>    | 2.2 [1.2; 4.2]                     | 14.0 [0.6; 49.6] <sup>b</sup>      | 3.1 [1.1; 5.8]                        | 20.1 [6.1; 38.0] <sup>b</sup>       | <b>0.0005</b> <sup>†</sup>  | <b>0.00009</b> <sup>†</sup> |
|              | <b>C22:0</b>         | 20.6 [10.1; 41.6]                  | -2.6 [-19.1; 3.5] <sup>a</sup>   | 26.1 [16.8; 61.9]                  | 923.9 [27.2; 1675.7] <sup>b</sup>  | 37.5 [18.1; 55.3]                     | 740.8 [237.4; 3584.8] <sup>b</sup>  | <b>0.00001</b> <sup>†</sup> | <b>0.00001</b> <sup>†</sup> |
|              | <b>C22:1</b>         | 1.8 [0.6; 3.4]                     | 0.1 [-1.3; 0.6]                  | 3.6 [2.0; 6.9]                     | 31.3 [0.6; 60.2]                   | 4.9 [2.6; 9.7]                        | 23.4 [0.9; 120.9]                   | <b>0.032</b> <sup>†</sup>   | <b>0.008</b> <sup>†</sup>   |
|              | <b>C24:0</b>         | 24.4 [12.5; 48.8]                  | -5.4 [-14.7; 3.0] <sup>a</sup>   | 25.4 [16.0; 64.2]                  | 685.8 [23.5; 1602.6] <sup>b</sup>  | 41.4 [22.9; 53.6]                     | 820.3 [174.1; 3408.2] <sup>b</sup>  | <b>0.00002</b> <sup>†</sup> | <b>0.00001</b> <sup>†</sup> |
|              | <b>C24:1</b>         | 19.5 [9.3; 40.2]                   | -4.1 [-13.3; 4.1] <sup>a</sup>   | 28.7 [17.0; 66.6]                  | 90.0 [-13.7; 336.5] <sup>ab</sup>  | 47.4 [26.3; 76]                       | 115.1 [26.1; 558.5] <sup>b</sup>    | <b>0.006</b> <sup>†</sup>   | <b>0.002</b> <sup>†</sup>   |
|              | <b>C26:0</b>         | 3.3 [2.8; 4.7]                     | -0.5 [-2.0; 0.0] <sup>a</sup>    | 3.2 [1.9; 4.8]                     | 10.9 [-0.4; 39.5] <sup>ab</sup>    | 4.0 [2.2; 4.6]                        | 18.4 [3.5; 69.9] <sup>b</sup>       | <b>0.006</b> <sup>†</sup>   | <b>0.002</b> <sup>†</sup>   |
|              | <b>C26:1</b>         | 2.7 [1.4; 3.0]                     | -1.0 [-2.2; -0.2] <sup>a</sup>   | 1.8 [1.0; 2.9]                     | 1.2 [-1.4; 6.7] <sup>ab</sup>      | 1.8 [0.7; 3.5]                        | 2.5 [-0.1; 15.4] <sup>b</sup>       | <b>0.035</b> <sup>†</sup>   | <b>0.012</b> <sup>†</sup>   |
| <b>MU</b>    | 71.0 [38.7; 101.4]   | -21.5 [-31.0; -7.2] <sup>a</sup>   | 68.9 [48.7; 114.6]               | 401.2 [-26.5; 796.9] <sup>b</sup>  | 105.0 [62.3; 162.1]                | 628.2 [173.9; 1384.2] <sup>b</sup>    | <b>0.003</b> <sup>†</sup>           | <b>0.001</b> <sup>†</sup>   |                             |
| <b>SAT</b>   | 245.9 [118.2; 397.9] | -17.6 [-184.7; -11.7] <sup>a</sup> | 342.8 [146.8; 422.7]             | 4302.4 [51.1; 6853.3] <sup>b</sup> | 317.0 [191.7; 539.0]               | 3123.8 [1030.4; 13955.2] <sup>b</sup> | <b>0.0002</b> <sup>†</sup>          | <b>0.00006</b> <sup>†</sup> |                             |
| <b>Total</b> | 291.6 [145.5; 485.5] | -22.7 [-215.8; -19.8] <sup>a</sup> | 403.7 [195.5; 537.2]             | 4703.6 [15.4; 7924.2] <sup>b</sup> | 452.7 [263.3; 661.1]               | 3850.0 [1204.2; 15728.7] <sup>b</sup> | <b>0.0002</b> <sup>†</sup>          | <b>0.00006</b> <sup>†</sup> |                             |

Data are presented as median [q1; q3] (control n = 9; 3g-PL n = 7; 5g-PL n = 8) and expressed in nmol / g of lyophilized fecal samples. Results are presented based on the assumption of sphingosine d18:1 as the major sphingoid base.  $P$  values presented in bold highlight significant intervention effect.  $P_{\text{group}}$  represents  $P$  value associated with group effect as calculated by generalized linear model, while  $P_{\text{PL}}$  represents  $P$  value associated with binary effect of milk PL compared to control. <sup>†</sup> $P$  value remains significant (< 0.05) after adjustment for clinical center, quartiles of volunteer age and waist circumference. <sup>ab</sup>Different superscript letters indicate statistically different intervention effects between groups as calculated by *post hoc* analysis. Cer: ceramides; MU: monounsaturated species; PL: polar lipids; SAT: saturated species SM: sphingomyelin.

**Supplemental Table 5. Daily self-reported food intake (VALOBAB-C trial).**

| All foods<br>(including test cheese) | Control (n=18) |              | 3g-PL (n=18)  |              | 5g-PL (n=20)  |              | <i>P</i> <sub>group</sub> |
|--------------------------------------|----------------|--------------|---------------|--------------|---------------|--------------|---------------------------|
|                                      | V1             | ΔV2-V1       | V1            | ΔV2-V1       | V1            | ΔV2-V1       |                           |
| <b>Energy (kcal)</b>                 | 1755.8 ±95.6   | 36.5 ±66.7   | 1725.7 ±70.4  | -4.4 ±57.5   | 1999.0 ±77.2  | -113.9 ±97.9 | 0.37                      |
| <b>Protein (% TEI)</b>               | 19.75 ±0.83    | -0.24 ±0.72  | 18.54 ±0.64   | -0.48 ±0.96  | 18.31 ±0.56   | 0.47 ±0.58   | 0.64                      |
| <b>Fat (% TEI)</b>                   | 32.75 ±0.91    | -0.60 ±0.93  | 32.57 ±1.02   | -0.68 ±1.33  | 33.70 ±1.22   | 0.17 ±1.01   | 0.83                      |
| <b>Carbohydrates (% TEI)</b>         | 43.21 ±1.43    | 1.21 ±1.23   | 44.51 ±1.20   | 1.15 ±1.25   | 43.44 ±1.37   | -0.59 ±1.02  | 0.45                      |
| <b>Simple sugars (g)</b>             | 68.18 ±5.02    | 4.62 ±3.90   | 68.60 ±6.20   | 4.81 ±5.02   | 80.45 ±5.30   | 1.43 ±4.58   | 0.83                      |
| <b>Fibers (g)</b>                    | 17.61 ±1.14    | -0.22 ±1.16  | 17.46 ±1.00   | -1.20 ±0.65  | 19.43 ±1.12   | -1.02 ±1.19  | 0.78                      |
| <b>Cholesterol (mg)</b>              | 271.67 ±25.93  | 15.01 ±24.24 | 288.53 ±34.84 | 20.37 ±43.92 | 322.61 ±31.60 | 87.54 ±34.84 | 0.27                      |
| <b>Alcohol (% TEI)</b>               | 0.63 ±0.32     | -0.36 ±0.26  | 0.72 ±0.25    | -0.19 ±0.31  | 1.18 ±0.38    | -0.09 ±0.27  | 0.79                      |
| <b>SFAs (g)</b>                      | 17.97 ±1.72    | -0.09 ±1.29  | 19.03 ±1.90   | -1.31 ±1.89  | 21.57 ±1.89   | 0.08 ±1.87   | 0.82                      |
| <b>MUFAs (g)</b>                     | 18.53 ±2.02    | -0.45 ±2.31  | 18.45 ±1.52   | -0.97 ±1.70  | 22.49 ±1.97   | -2.87 ±2.22  | 0.69                      |
| <b>PUFAs (g)</b>                     | 7.06 ±0.63     | 0.17 ±0.88   | 6.29 ±0.44    | 0.52 ±0.86   | 9.11 ±0.70    | -1.59 ±0.93  | 0.20                      |

Intake was reported the 4 days before (V1) and after (V2) 4 weeks of consumption of 100 g of cream cheese / day with or without PL. Data are presented as mean ± SEM. *P*<sub>group</sub> represents *P*-value associated with group effect as calculated by generalized linear model. *P* values after adjustment for clinical center, quartiles of volunteer age and waist circumference were also not significant (> 0.05). MUFA: monounsaturated fatty acid; PL: polar lipids; PUFA: polyunsaturated fatty acid; SFA: saturated fatty acid; TEI: total energy intake.

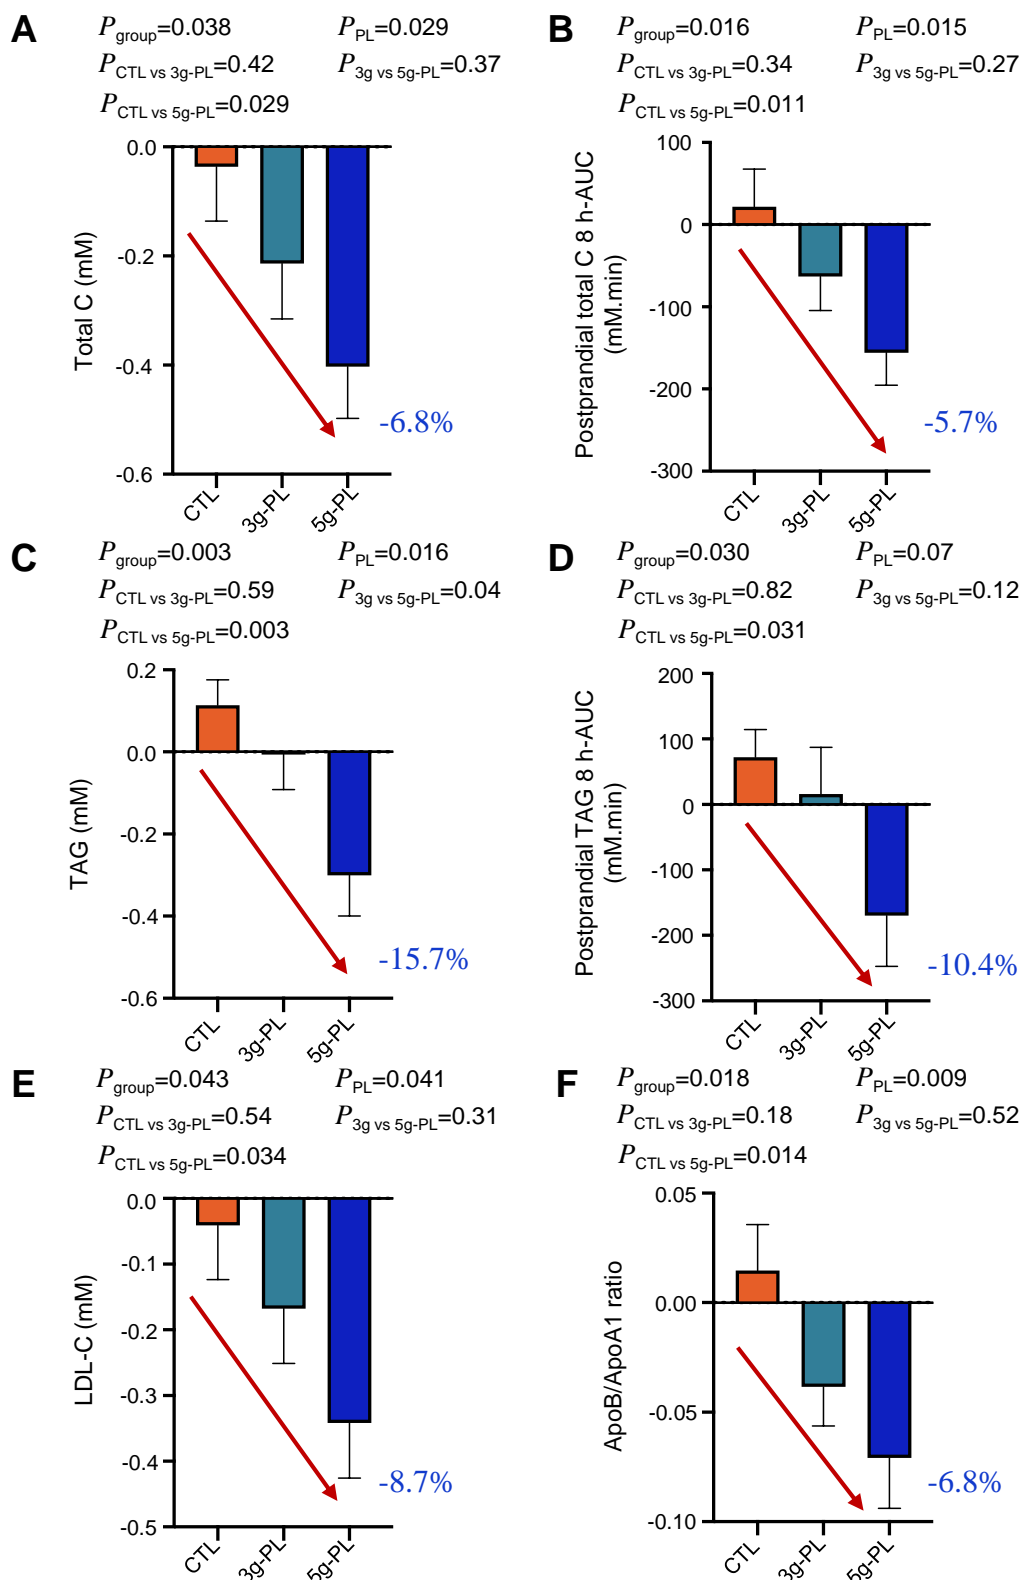

**Supplemental Figure 1. Summary of the main VALOBAB-C trial outcomes (Vors *et al.* Gut 2020): milk SP via milk PL supplementation during 4 weeks reduces specific biomarkers of cardiovascular risk, at fasting and during the postprandial period. (A) fasting serum total C. (B) 8h-postprandial AUC of serum total C. (C) fasting serum TAG. (D) 8 h-postprandial AUC of serum TAG. (E) fasting serum LDL-C. (F) fasting plasma ApoB/ApoA1 ratio. Data are presented as mean  $\pm$  SEM (n = 19 for control and 3g-PL groups, n = 20 for 5g-PL group). Statistical analysis was done using linear mixed model followed by Tukey-Kramer's *post hoc* test ( $P_{\text{group}}$  and  $P_{\text{posthoc}}$ ) and  $P_{\text{PL}}$  represents  $P$  value associated with binary effect of milk PL compared to control.  $P_{\text{posthoc}}$  corresponds altogether to  $P_{\text{CTL vs 3g-PL}}$ ,  $P_{\text{CTL vs 5g-PL}}$  and  $P_{\text{3g vs 5g-PL}}$ . Apo: apolipoprotein; C: cholesterol; CTL: control; LDL: low density lipoprotein; PL: polar lipids; TAG: triacylglycerols.**

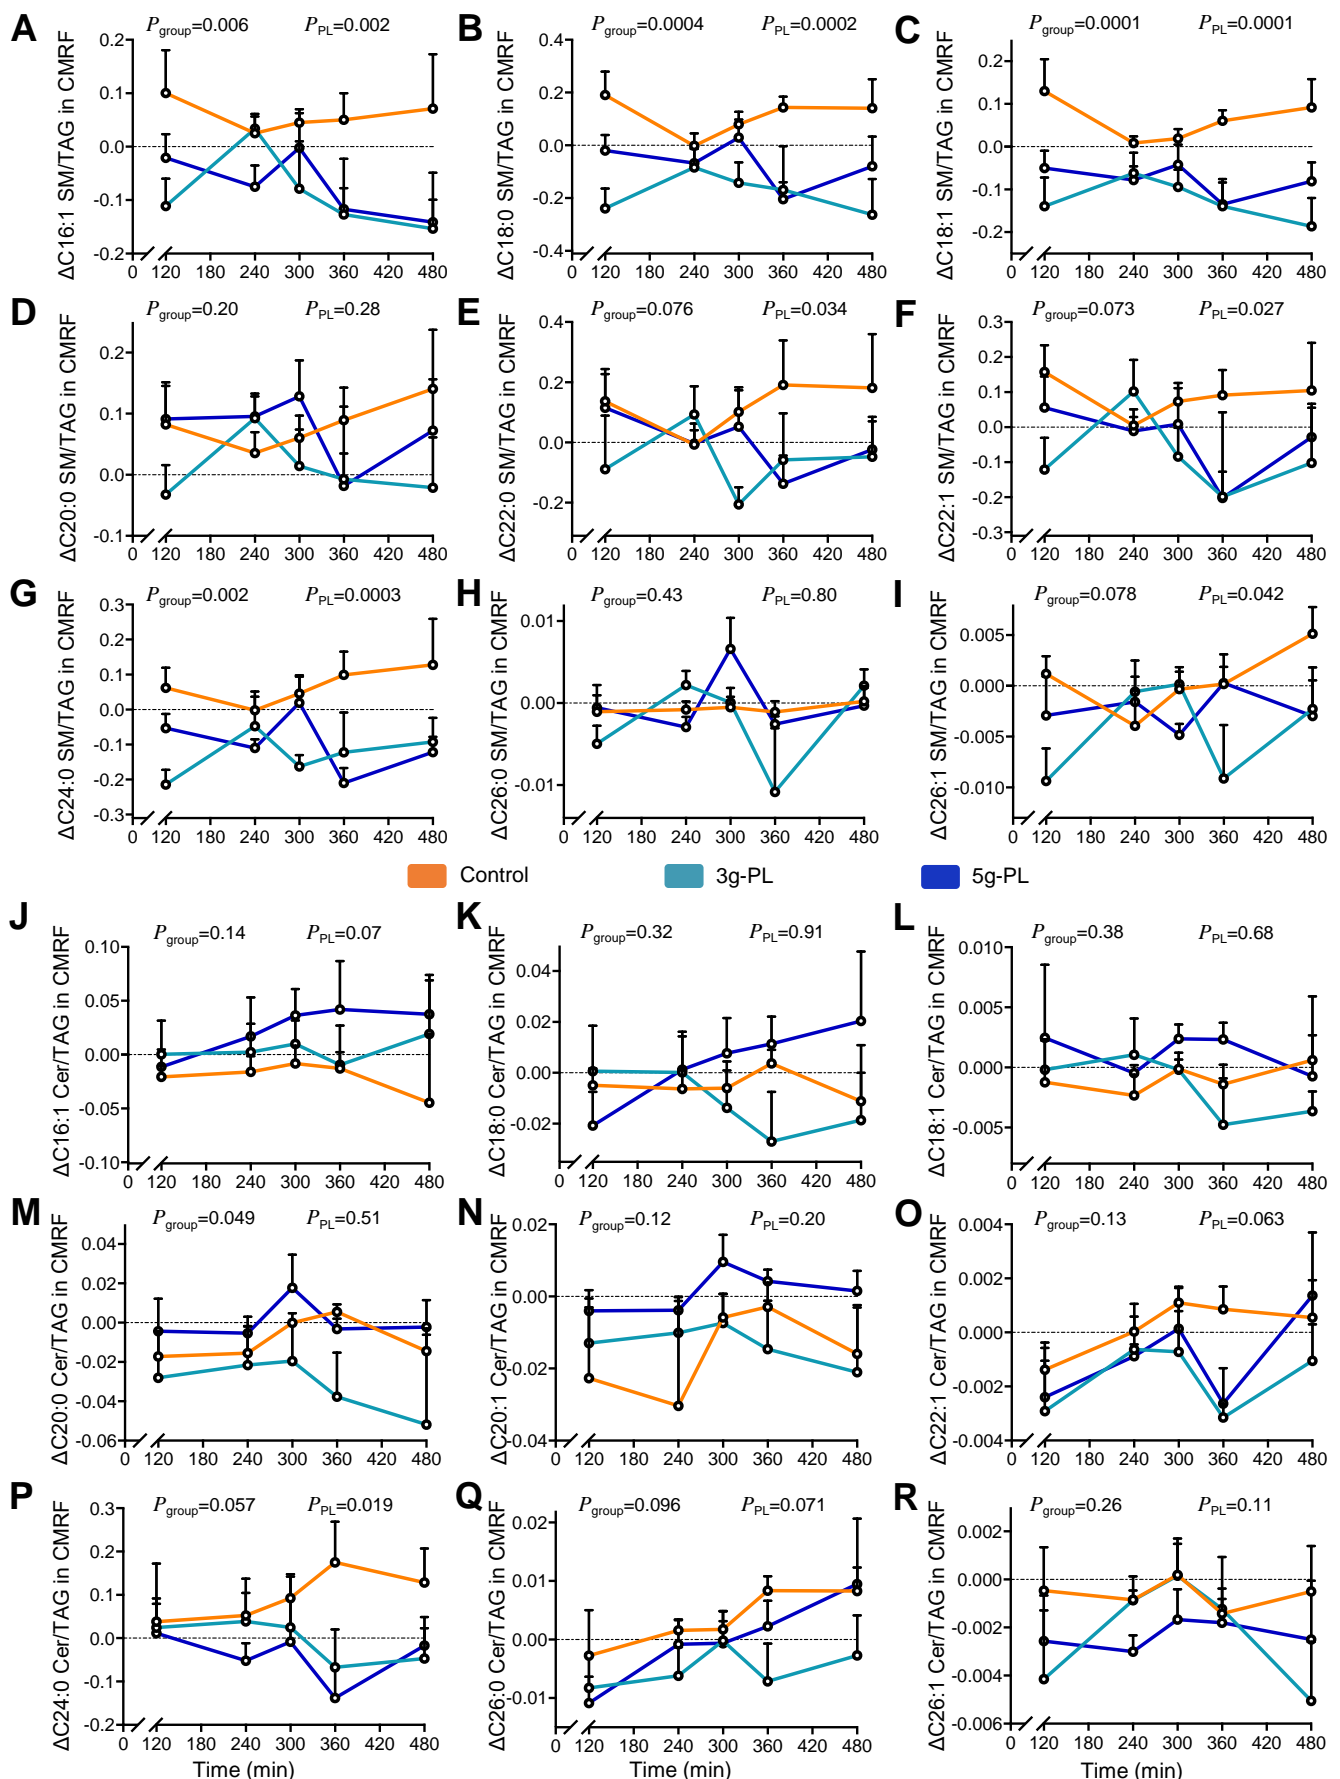

**Supplemental Figure 2. Milk PL modulate SM and Cer molecular composition of plasma CMRF (complementary to Figure 3 and Supplemental Table 3, VALOBAB-C trial).** Data are presented as mean  $\pm$  SEM (n = 6 / group) and correspond to  $\Delta$ SM (A-I) and  $\Delta$ Cer (J-R) species of interest in CMRF. Data are expressed in  $\mu\text{mol} / \text{mmol}$  of plasma CMRF TAG. Cer, ceramides; CMRF: chylomicron-rich fractions; CTL: control; PL: polar lipids; SM: sphingomyelins; TAG: triacylglycerols. Supplemental material - Le Barz, Vors et al. JCI Insight - 2021

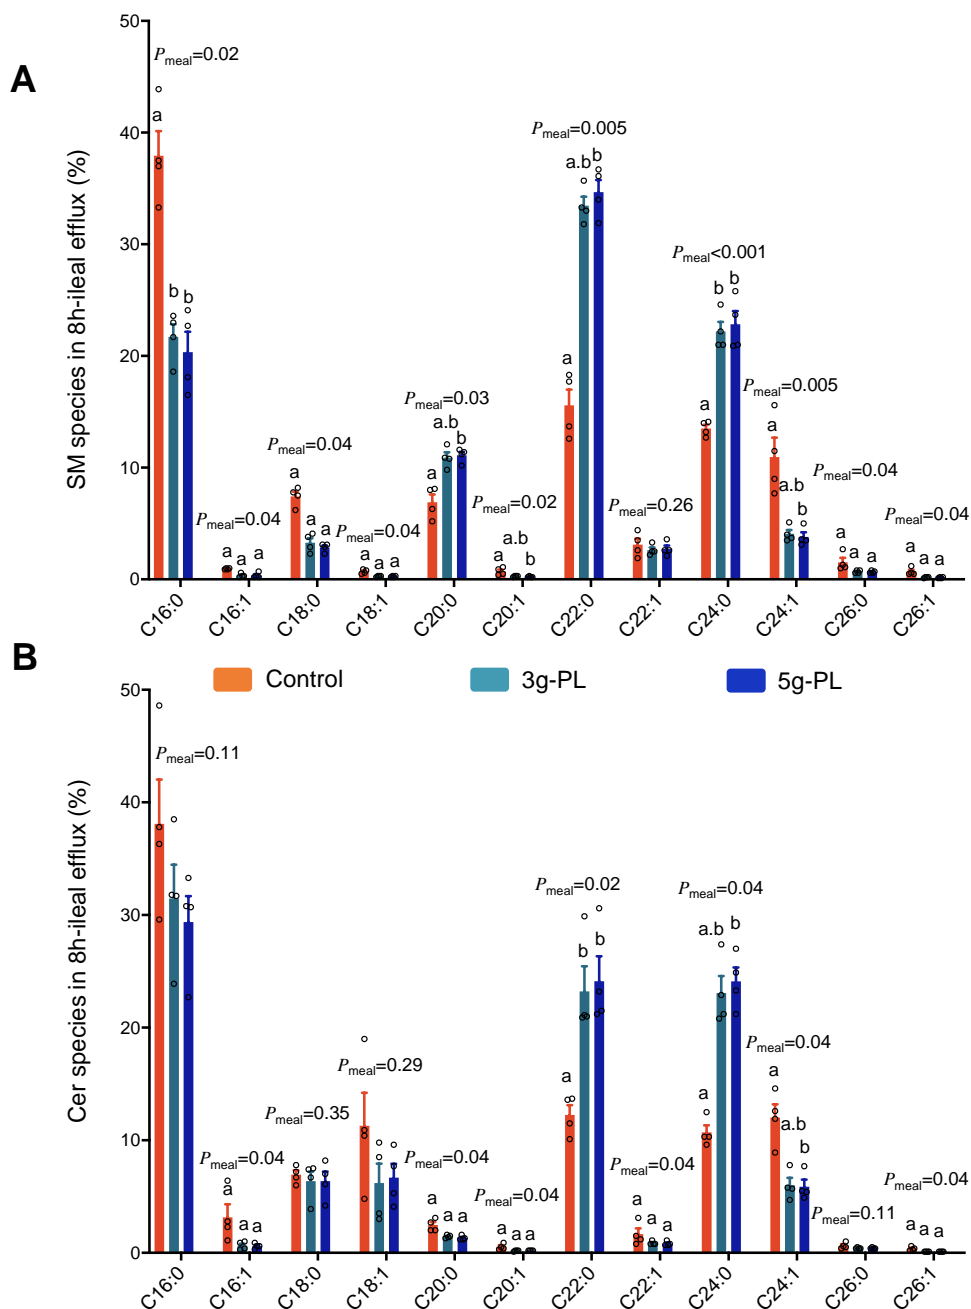

**Supplemental Figure 3. Milk SP via milk PL ingestion increase SM and Cer molecular profiles in 8h ileal efflux (complementary to Figure 4, VALOBAB-D trial).** Cumulated enrichment over 0-480 min of SM (A) and Cer (B) species. Data are presented as mean  $\pm$  SEM and expressed as percentage of each SM or Cer species in total analyzed SM or Cer, respectively (n = 4). Results are presented based on the assumption of sphingosine d18:1 as the major sphingoid base. Empty circles correspond to individual values. Statistical analysis was done using Friedman's test followed by Dunn's *post hoc* test (non-normal data) or RM one-way ANOVA followed by a Tukey's *post hoc* test (normal data). <sup>a,b</sup> Different letters indicate statistically different intervention effects between groups ( $P < 0.05$ ) as calculated by *post hoc* analysis. Cer: ceramides; CTL: control; PL: polar lipids; SP: sphingolipids; SM: sphingomyelin.



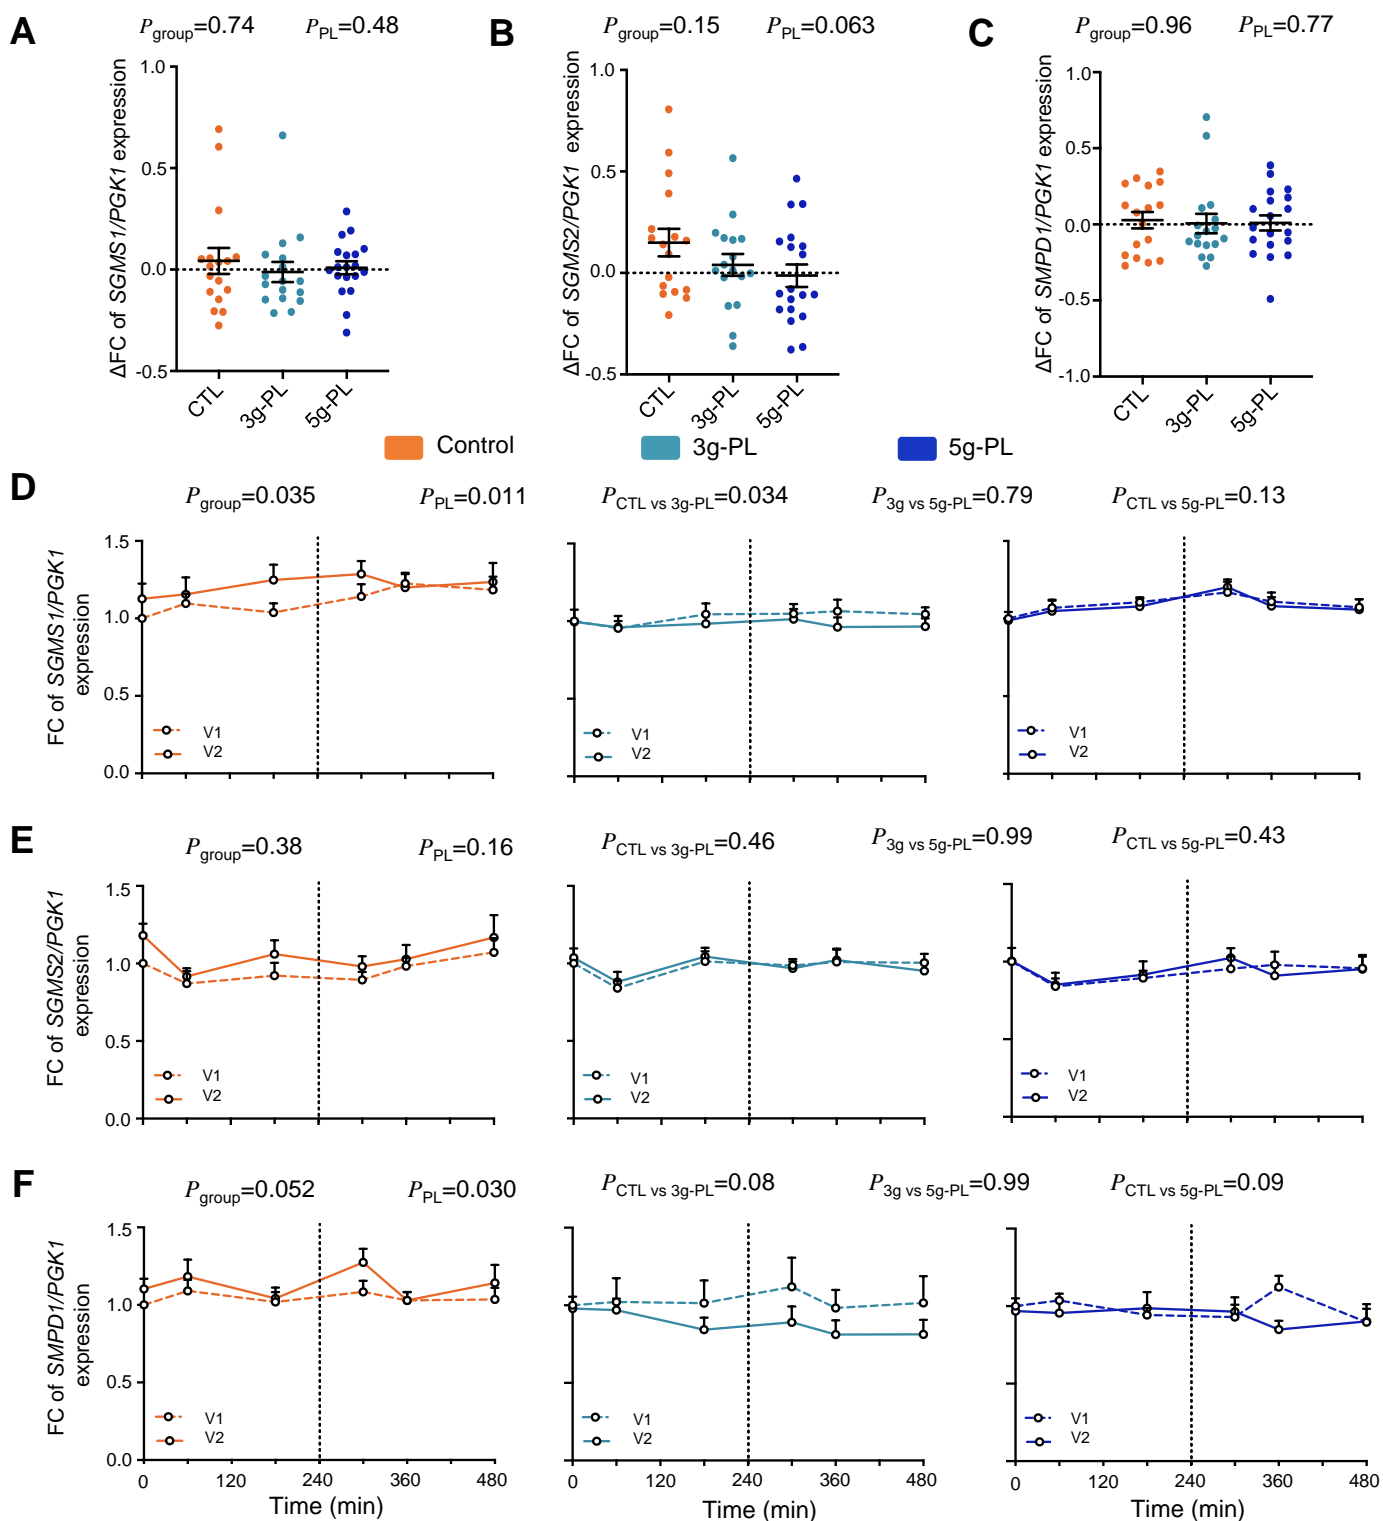

**Supplemental Figure 4. Impact of 4-week milk SP via milk PL supplementation on gene expression in whole blood cells of key enzymes involved in SP metabolism (VALOBAB-C trial).** (A), (B), (C) intervention impact on the gene expression of *SGMS1*, *SGMS2* and *SMPD1* in whole blood cells at fasting. (D), (E), (F) gene expression of these genes along the 8 h postprandial period before (V1: dotted line) and after (V2: full line) the daily consumption of 100 g of cheese with or without PL during 4 weeks. Gene expressions are normalized by the housekeeping gene *PGK1*. Data are presented as mean  $\pm$  SEM (n = 17 for control and 3g-PL groups, n = 19 for 5g-PL group in panels A-C. n = 10 / group in panels D-F). Statistical analysis was done using a linear mixed model followed by Tukey-Kramer's *post hoc* test ( $P_{\text{group}}$  and  $P_{\text{posthoc}}$ ) and  $P_{\text{PL}}$  represents  $P$  value associated with binary effect of milk PL compared to control.  $P_{\text{posthoc}}$  corresponds altogether to  $P_{\text{CTL vs 3g-PL}}$ ;  $P_{\text{CTL vs 5g-PL}}$  and  $P_{\text{3g vs 5g-PL}}$ . CTL: control; FC: fold-change versus fasting gene expression at V1; PGK1: phosphoglycerate kinase 1; PL: polar lipids; SGMS1/2: sphingomyelin synthase 1 and 2; SMPD1: sphingomyelin phosphodiesterase 1.

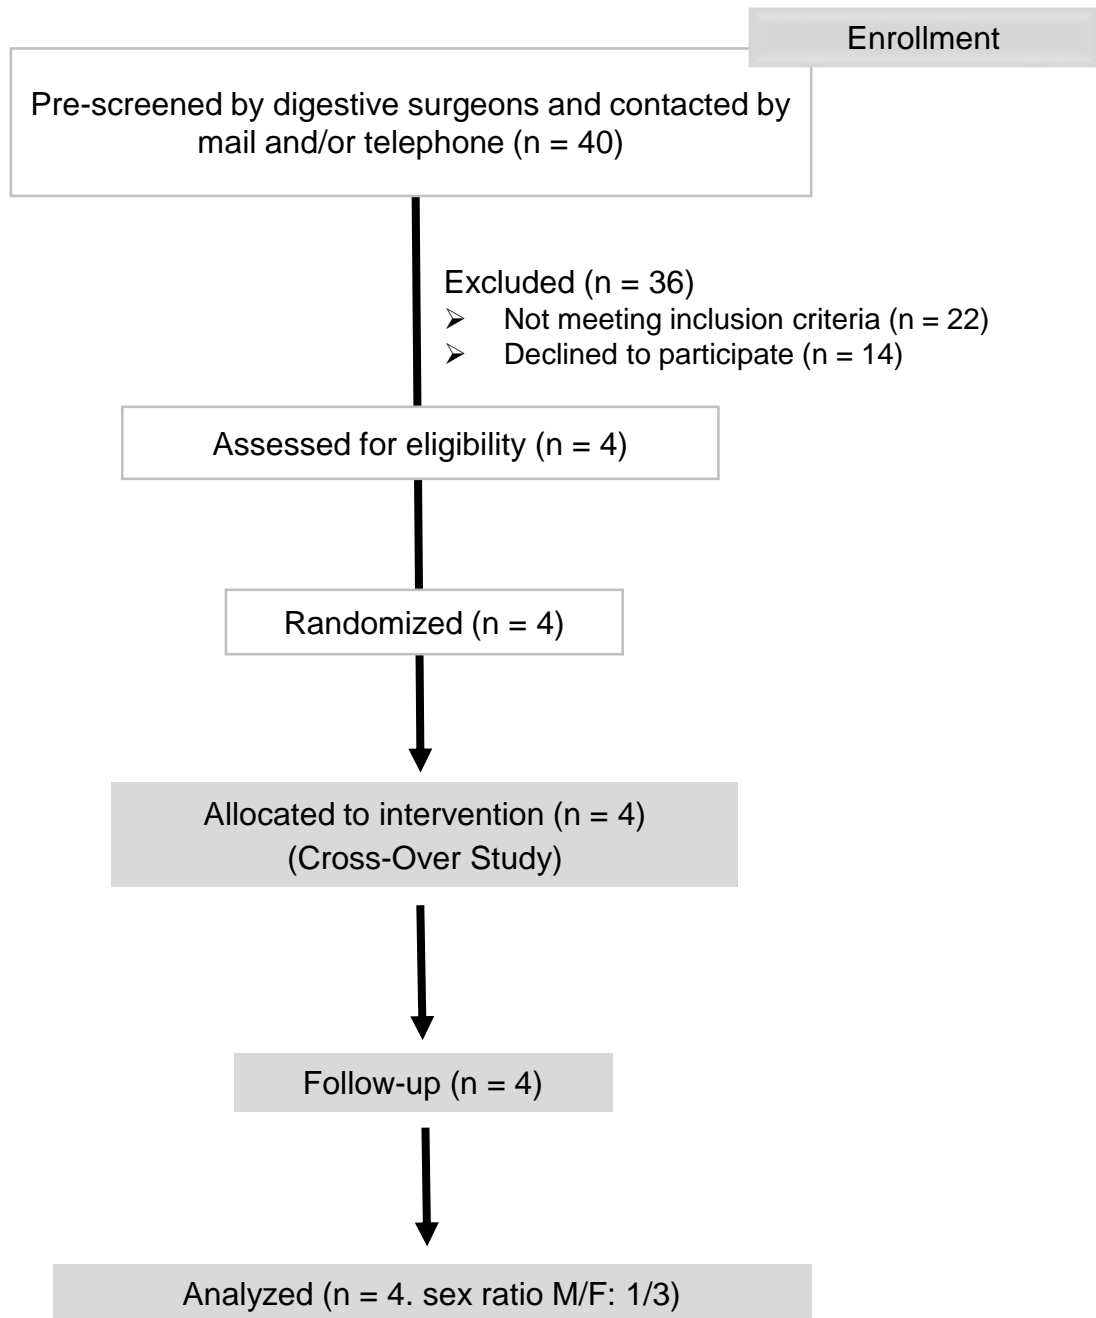

**Supplemental Figure 5. Flow chart diagram of the VALOBAB-D clinical trial.**
